# Supplementary material for: Chemical sensors based on nano-sized lanthanide-grafted periodic mesoporous organosilica hybrid materials
Source: Royal Society of Chemistry journal article supplement (doi:10.1039/c9tc01328h), 2019-01-01
Supplement: c9tc01328h1.pdf [file c9tc01328h1.pdf]

## SUPPORTING INFORMATION

### Chemical Sensors Based on Nano-Sized Lanthanide-Grafted Periodic Mesoporous Organosilica Hybrid Materials

Anna M. Kaczmarek,\* and Pascal Van Der Voort\*

COMOC – Center for Ordered Materials Organometallics and Catalysis, Department of Chemistry, Ghent University, Krijgslaan 281-S3, B-9000 Ghent, Belgium

Table S1 Relative Ln<sup>3+</sup> contents for the PMO@Eu,Tb, PMO@Eu,Tb\_phen and PMO@Eu,Tb\_bpy samples from synthesis (calcd.) and as determined by XRF.

| Sample         | Molar amounts used in synthesis [mmol] |                  | Eu <sup>3+</sup> ion |       | Tb <sup>3+</sup> ion |       |
|----------------|----------------------------------------|------------------|----------------------|-------|----------------------|-------|
|                | Eu <sup>3+</sup>                       | Tb <sup>3+</sup> | Calcd.               | XRF   | Calcd.               | XRF   |
| PMO@Eu,Tb      | 0.50                                   | 0.50             | 50%                  | 48.7% | 50%                  | 51.3% |
| PMO@Eu,Tb_phen | 0.50                                   | 0.50             | 50%                  | 49.8% | 50%                  | 50.1% |
| PMO@Eu,Tb_bpy  | 0.50                                   | 0.50             | 50%                  | 50.6% | 50%                  | 49.4% |

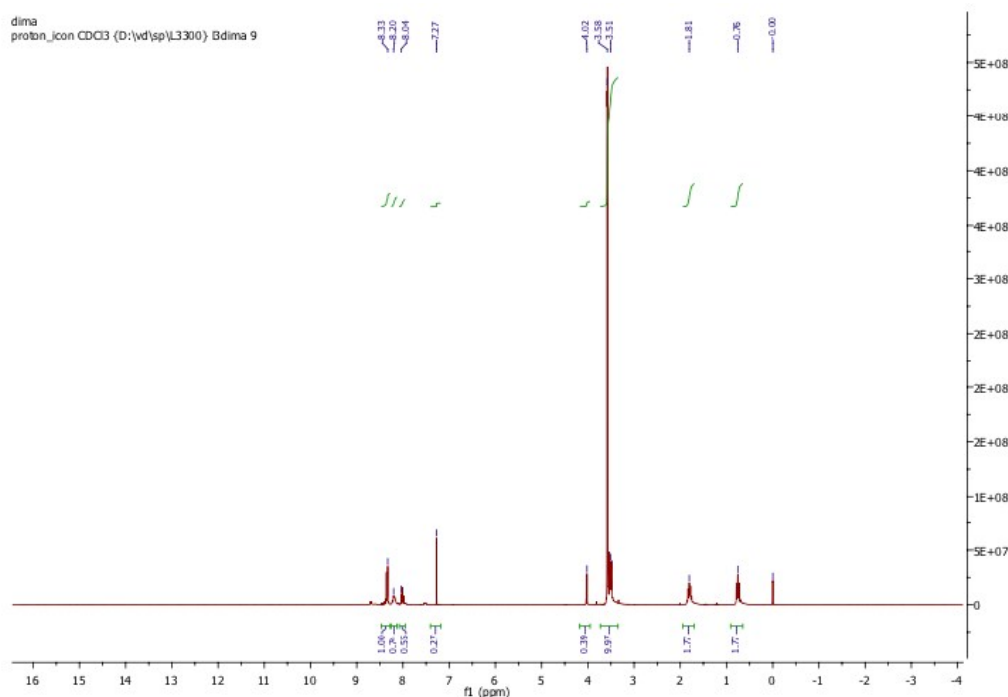

Figure S1 <sup>1</sup>H NMR of the PMO precursor (CDCl<sub>3</sub>, 300 MHz).

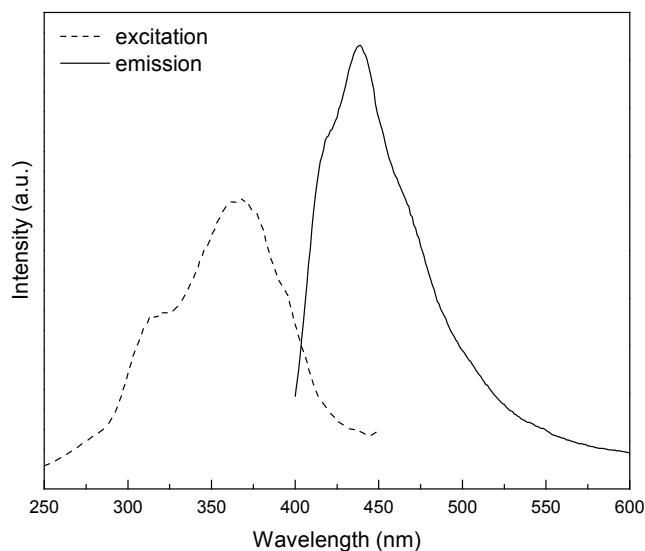

Figure S2 RT combined excitation-emission spectrum of the pristine PMO (the dotted line represents the excitation spectrum and the continuous line represents the emission spectrum).

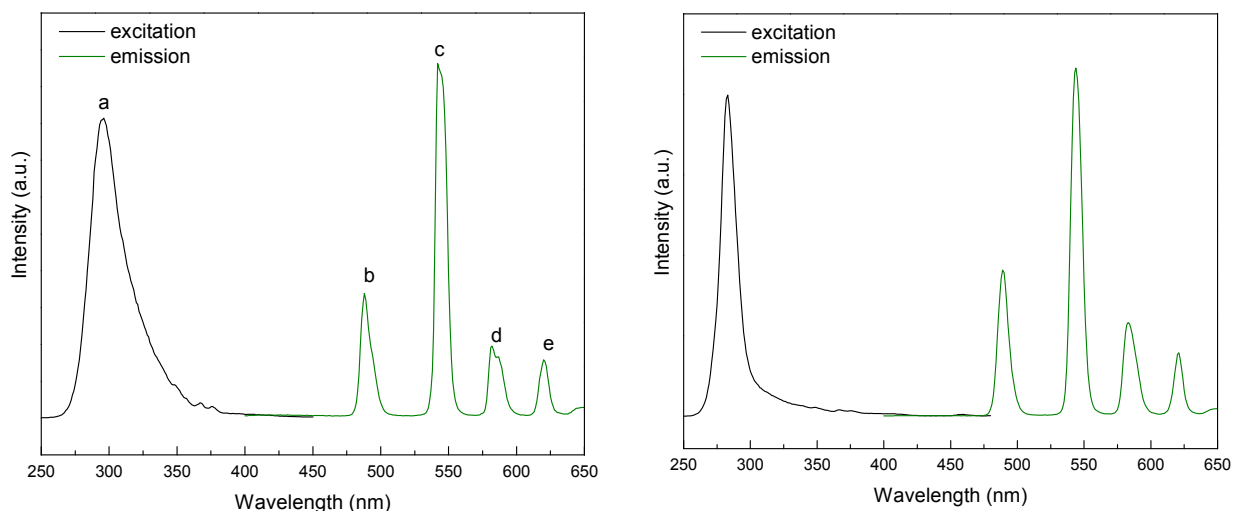

Figure S3 Left: RT solid-state combined excitation-emission spectrum of PMO@Tb, right: RT combined excitation-emission spectrum of PMO@Tb in water suspension. The emission spectra were recorded when exciting into the maximum of the broad ligand band and the excitation spectra were monitored at the  ${}^5D_4 \rightarrow {}^7F_5$  transition peak.

Table S2 Assignment of peaks labeled in Figure S3 (PMO@Tb in solid-state).

| Label      | Wavelength (nm) | Transitions                   |
|------------|-----------------|-------------------------------|
| Excitation |                 |                               |
| a          | 295             | $\pi \rightarrow \pi^*$       |
| Emission   |                 |                               |
| b          | 488             | ${}^5D_4 \rightarrow {}^7F_6$ |
| c          | 542             | ${}^5D_4 \rightarrow {}^7F_5$ |
| d          | 581             | ${}^5D_4 \rightarrow {}^7F_4$ |
| e          | 619             | ${}^5D_4 \rightarrow {}^7F_3$ |

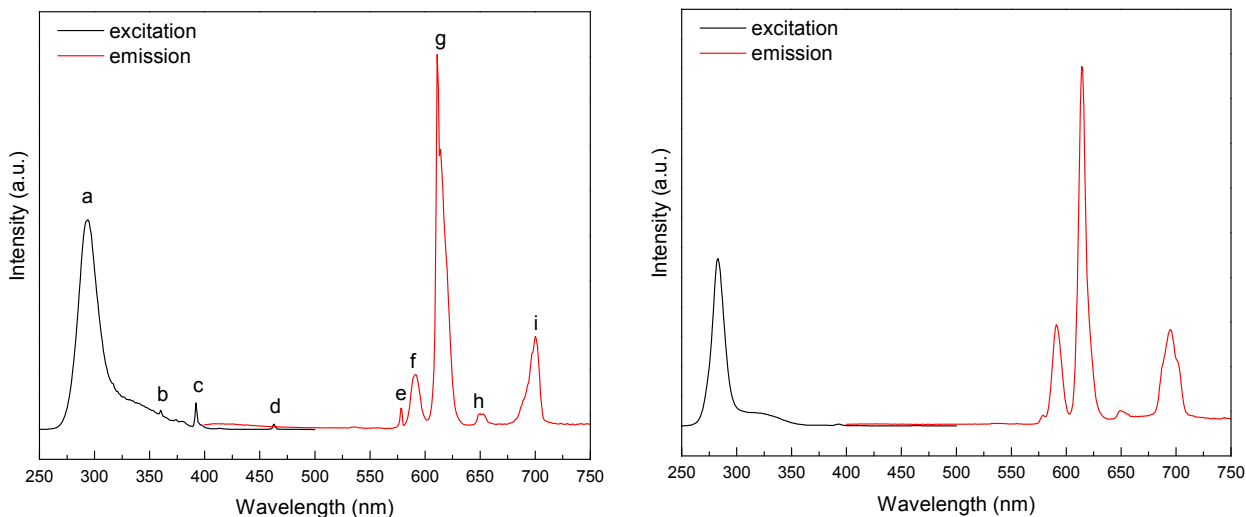

Figure S4 Left: RT solid-state combined excitation-emission spectrum of PMO@Eu, right: RT combined excitation-emission spectrum of PMO@Eu in water suspension. The emission spectra were recorded when exciting into the maximum of the broad ligand band and the excitation spectra were monitored at the  $^5D_0 \rightarrow ^7F_2$  transition peak.

Table S3 Assignment of peaks labeled in Figure S4 (PMO@Eu in solid-state).

| Label      | Wavelength (nm) | Transitions               |
|------------|-----------------|---------------------------|
| Excitation |                 |                           |
| a          | 293             | $\pi \rightarrow \pi^*$   |
| b          | 361             | $^5D_4 \leftarrow ^7F_0$  |
| c          | 392             | $^5L_6 \leftarrow ^7F_0$  |
| d          | 462             | $^5D_2 \leftarrow ^7F_0$  |
| Emission   |                 |                           |
| e          | 578             | $^5D_0 \rightarrow ^7F_0$ |
| f          | 591             | $^5D_0 \rightarrow ^7F_1$ |
| g          | 611             | $^5D_0 \rightarrow ^7F_2$ |
| h          | 651             | $^5D_0 \rightarrow ^7F_3$ |
| i          | 700             | $^5D_0 \rightarrow ^7F_4$ |

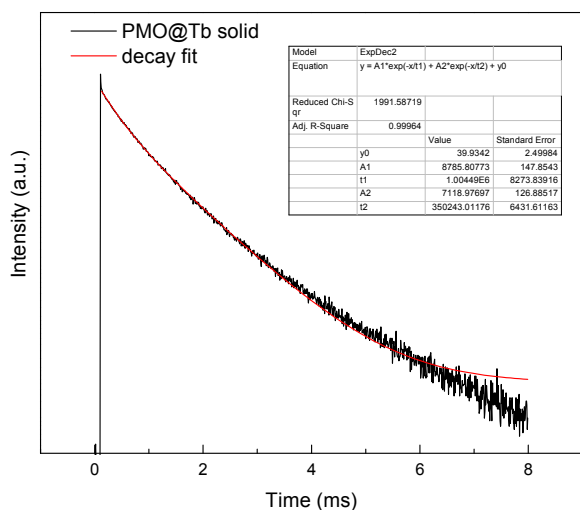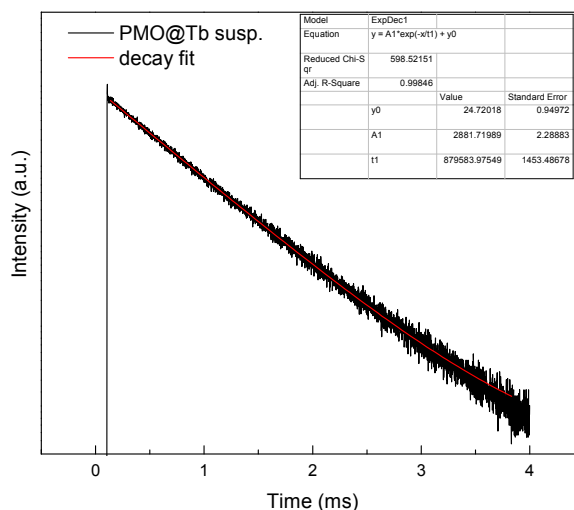

Figure S5 Left: decay profile of PMO@Tb sample in solid-state form, right: decay profile of PMO@Tb sample in suspension. The decay times were recorded when exciting into the maximum of the broad ligand band and monitoring at the  $^5D_4 \rightarrow ^7F_5$  transition peak.

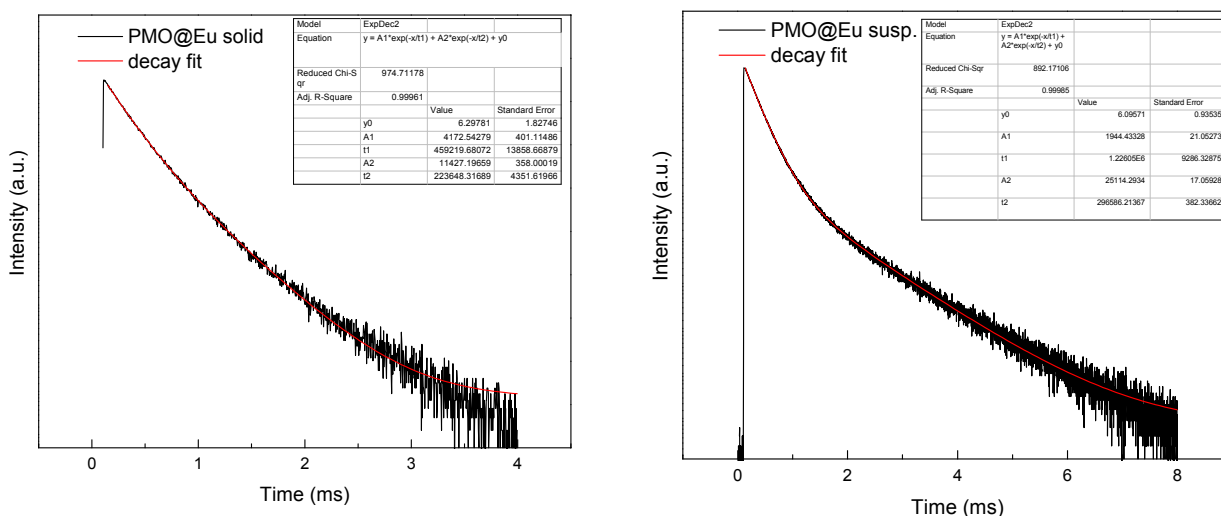

Figure S6 Left: decay profile of PMO@Eu sample in solid-state form, right: decay profile of PMO@Eu sample in suspension. The decay times were recorded when exciting into the maximum of the broad ligand band and monitoring at the  $^5D_0 \rightarrow ^7F_2$  transition peak.

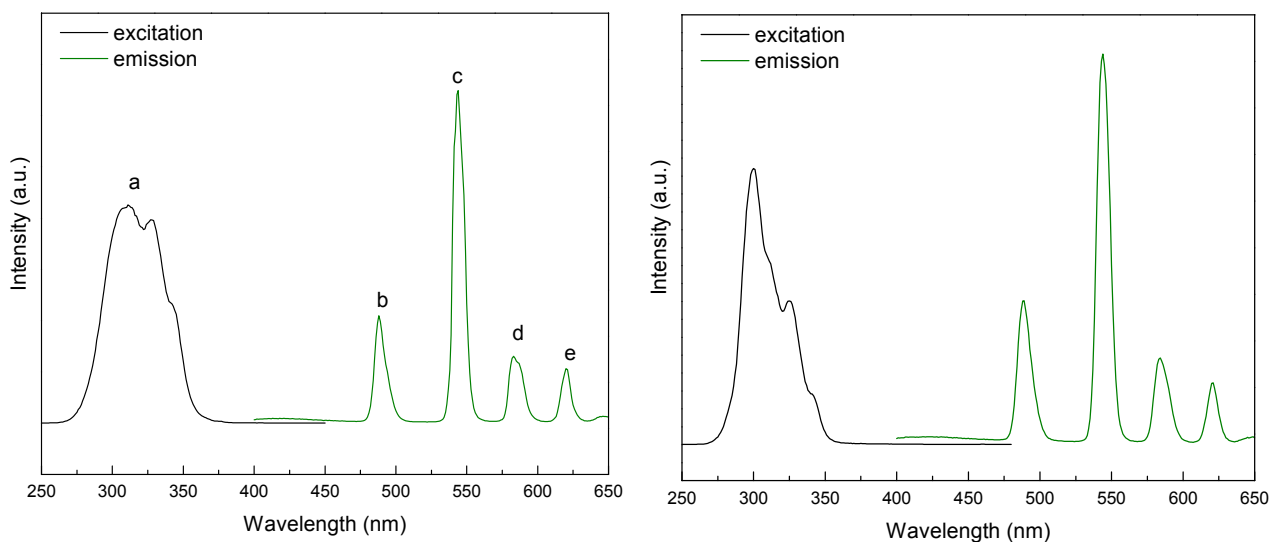

Figure S7 Left: RT solid-state combined excitation-emission spectrum of PMO@Tb\_phen, right: RT combined excitation-emission spectrum of PMO@Tb\_phen in water suspension. The emission spectra were recorded when exciting into the maximum of the broad ligand band and the excitation spectra were monitored at the  $^5D_4 \rightarrow ^7F_5$  transition peak.

Table S4 Assignment of peaks labeled in Figure S7 (PMO@Tb\_phen in solid-state).

| Label      | Wavelength (nm) | Transitions               |
|------------|-----------------|---------------------------|
| Excitation |                 |                           |
| a          | 312             | $\pi \rightarrow \pi^*$   |
| Emission   |                 |                           |
| b          | 487             | $^5D_4 \rightarrow ^7F_6$ |
| c          | 543             | $^5D_4 \rightarrow ^7F_5$ |
| d          | 583             | $^5D_4 \rightarrow ^7F_4$ |

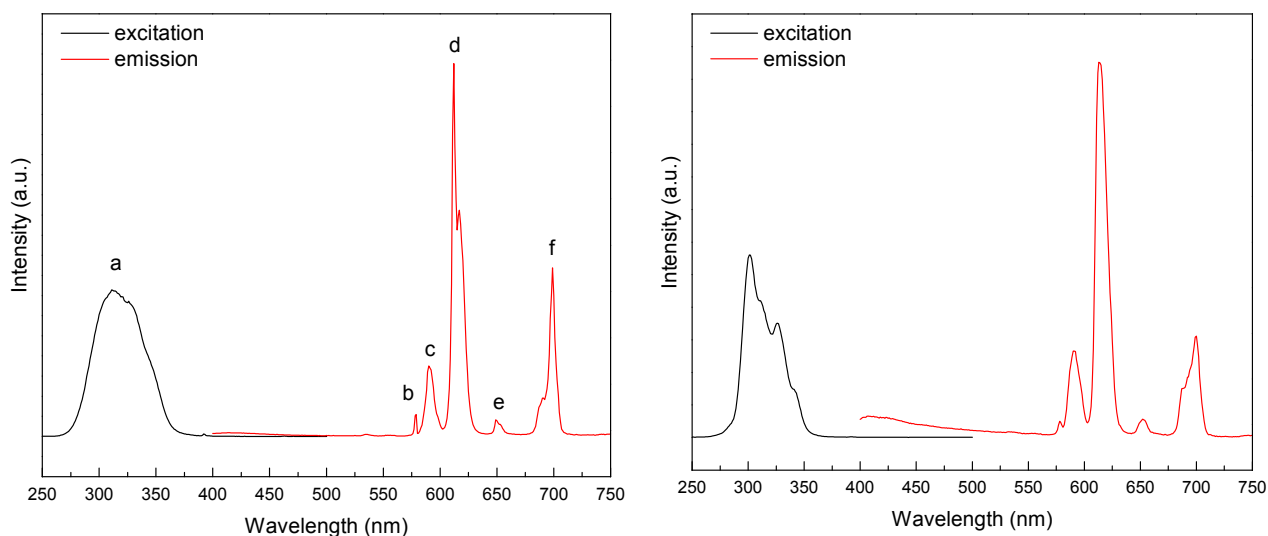

Figure S8 Left: RT solid-state combined excitation-emission spectrum of PMO@Eu\_phen, right: RT combined excitation-emission spectrum of PMO@Eu\_phen in water suspension. The emission spectra were recorded when exciting into the maximum of the broad ligand band and the excitation spectra were monitored at the  ${}^5D_0 \rightarrow {}^7F_2$  transition peak.

Table S5 Assignment of peaks labeled in Figure S8 (PMO@Eu\_phen in solid-state).

| Label      | Wavelength (nm) | Transitions                   |
|------------|-----------------|-------------------------------|
| Excitation |                 |                               |
| a          | 294             | $\pi \rightarrow \pi^*$       |
| b          | 361             | ${}^5D_4 \leftarrow {}^7F_0$  |
| c          | 392             | ${}^5L_6 \leftarrow {}^7F_0$  |
| d          | 462             | ${}^5D_2 \leftarrow {}^7F_0$  |
| Emission   |                 |                               |
| e          | 578             | ${}^5D_0 \rightarrow {}^7F_0$ |
| f          | 591             | ${}^5D_0 \rightarrow {}^7F_1$ |
| g          | 610             | ${}^5D_0 \rightarrow {}^7F_2$ |
| h          | 650             | ${}^5D_0 \rightarrow {}^7F_3$ |
| i          | 701             | ${}^5D_0 \rightarrow {}^7F_4$ |

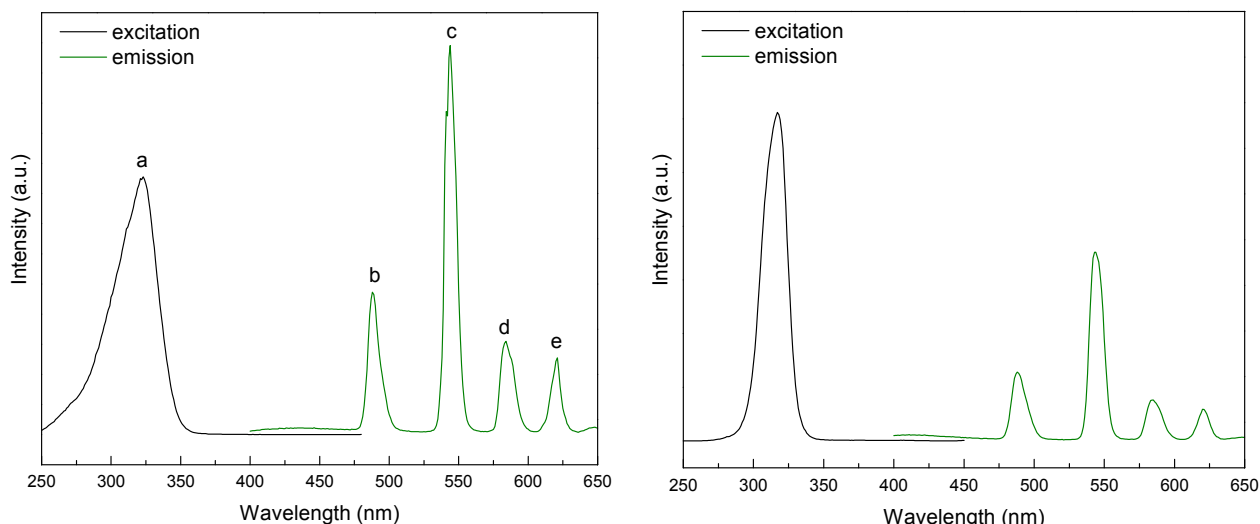

Figure S9 Left: RT solid-state combined excitation-emission spectrum of PMO@Tb\_bpy, right: RT combined excitation-emission spectrum of PMO@Tb\_bpy in water suspension. The emission spectra were recorded when exciting into the maximum of the broad ligand band and the excitation spectra were monitored at the  $^5D_4 \rightarrow ^7F_5$  transition peak.

Table S6 Assignment of peaks labeled in Figure S9 (PMO@Tb\_bpy in solid-state).

| Label      | Wavelength (nm) | Transitions               |
|------------|-----------------|---------------------------|
| Excitation |                 |                           |
| a          | 322             | $\pi \rightarrow \pi^*$   |
| Emission   |                 |                           |
| b          | 489             | $^5D_4 \rightarrow ^7F_6$ |
| c          | 543             | $^5D_4 \rightarrow ^7F_5$ |
| d          | 583             | $^5D_4 \rightarrow ^7F_4$ |
| e          | 620             | $^5D_4 \rightarrow ^7F_3$ |

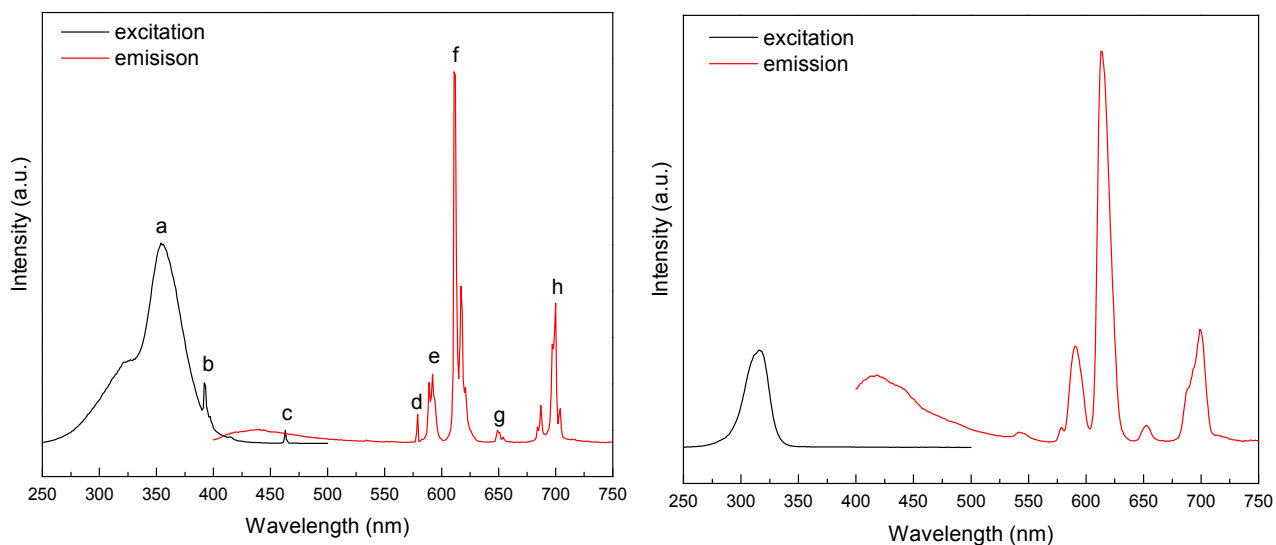

Figure S10 Left: RT solid-state combined excitation-emission spectrum of PMO@Eu\_bpy, right: RT combined excitation-emission spectrum of PMO@Eu\_bpy in water suspension. The emission spectra were recorded when exciting into the maximum of the broad ligand band and the excitation spectra were monitored at the  $^5D_0 \rightarrow ^7F_2$  transition peak.

Table S7 Assignment of peaks labeled in Figure S10 (PMO@Eu\_bpy in solid-state).

| Label      | Wavelength (nm) | Transitions                   |
|------------|-----------------|-------------------------------|
| Excitation |                 |                               |
| a          | 354             | $\pi \rightarrow \pi^*$       |
| b          | 393             | ${}^5L_6 \leftarrow {}^7F_0$  |
| c          | 462             | ${}^5D_2 \leftarrow {}^7F_0$  |
| Emission   |                 |                               |
| d          | 579             | ${}^5D_0 \rightarrow {}^7F_0$ |
| e          | 591             | ${}^5D_0 \rightarrow {}^7F_1$ |
| f          | 612             | ${}^5D_0 \rightarrow {}^7F_2$ |
| g          | 649             | ${}^5D_0 \rightarrow {}^7F_3$ |
| h          | 698             | ${}^5D_0 \rightarrow {}^7F_4$ |

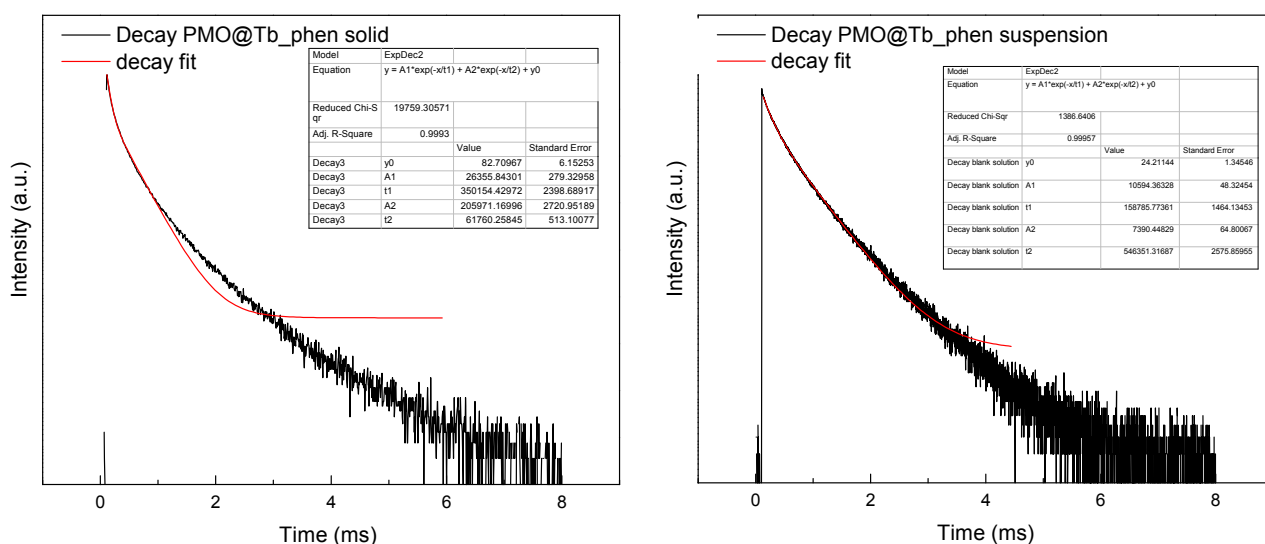

Figure S11 Left: decay profile of PMO@Tb\_phen sample in solid-state form, right: decay profile of PMO@Tb\_phen sample in suspension. The decay times were recorded when exciting into the maximum of the broad ligand band and monitoring at the  ${}^5D_4 \rightarrow {}^7F_5$  transition peak.

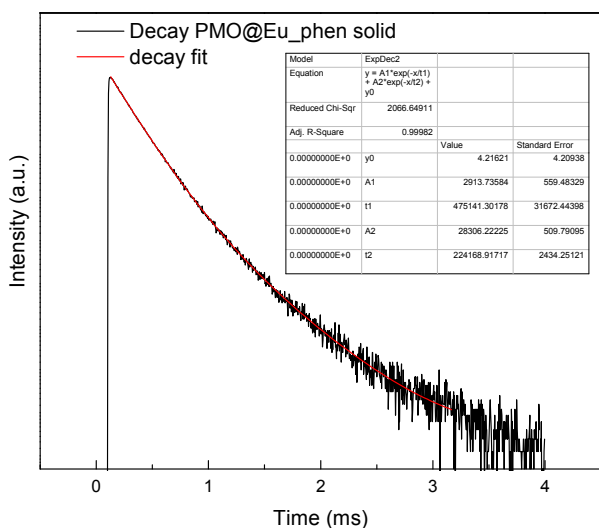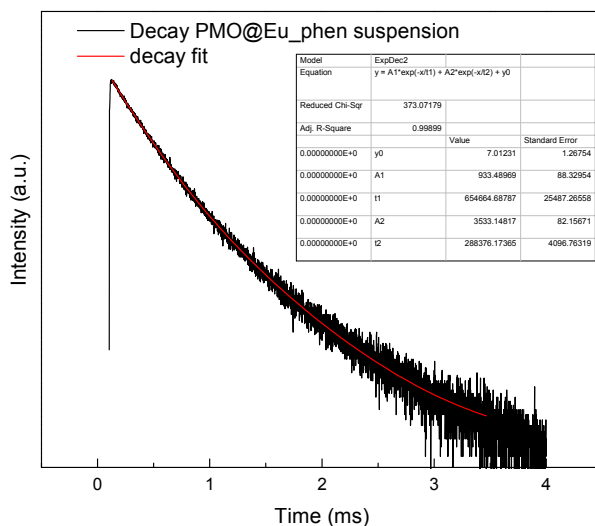

Figure S12 Left: decay profile of PMO@Eu\_phen sample in solid-state form, right: decay profile of PMO@Eu\_phen sample in suspension. The decay times were recorded when exciting into the maximum of the broad ligand band and monitoring at the  ${}^5D_0 \rightarrow {}^7F_2$  transition peak.

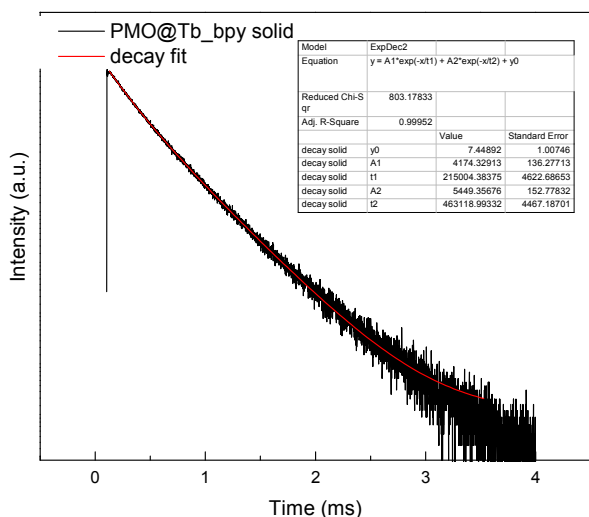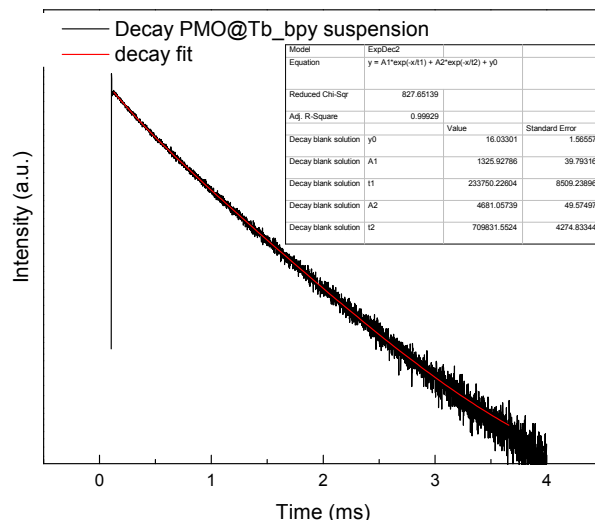

Figure S13 Left: decay profile of PMO@Tb\_bpy sample in solid-state form, right: decay profile of PMO@Tb\_bpy sample in suspension. The decay times were recorded when exciting into the maximum of the broad ligand band and monitoring at the  ${}^5D_4 \rightarrow {}^7F_5$  transition peak.



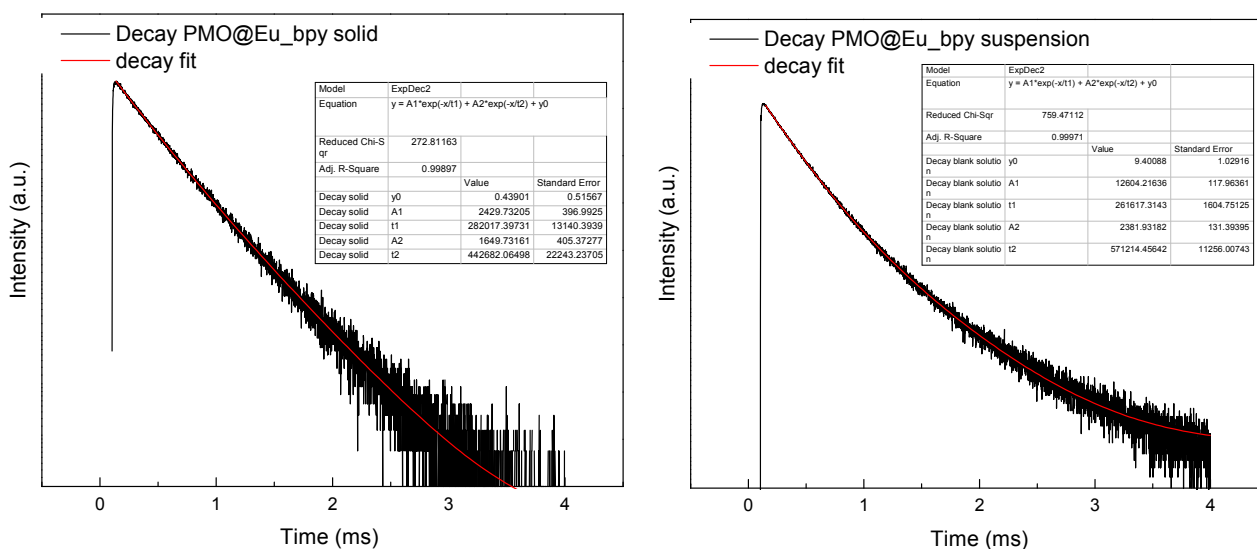

Figure S14 Left: decay profile of PMO@Eu\_bpy sample in solid-state form, right: decay profile of PMO@Eu\_bpy sample in suspension. The decay times were recorded when exciting into the maximum of the broad ligand band and monitoring at the  $^5D_0 \rightarrow ^7F_2$  transition peak.

Table S8 Luminescence decay times of studied materials

| Sample                 | $\tau_1(\mu\text{s})$ | $\tau_2(\mu\text{s})$ |
|------------------------|-----------------------|-----------------------|
| PMO@Tb solid           | 1004                  | 350                   |
| PMO@Tb suspension      | 879                   | -                     |
| PMO@Eu solid           | 459                   | 224                   |
| PMO@Eu suspension      | 1226                  | 296                   |
| PMO@Tb_phen            | 359                   | 62                    |
| PMO@Tb_suspension      | 546                   | 159                   |
| PMO@Eu_phen solid      | 475                   | 224                   |
| PMO@Eu_phen suspension | 654                   | 288                   |
| PMO@Tb_bpy solid       | 463                   | 215                   |
| PMO@Tb_bpy suspension  | 710                   | 234                   |
| PMO@Eu_bpy solid       | 443                   | 282                   |
| PMO@Eu_bpy suspension  | 571                   | 262                   |

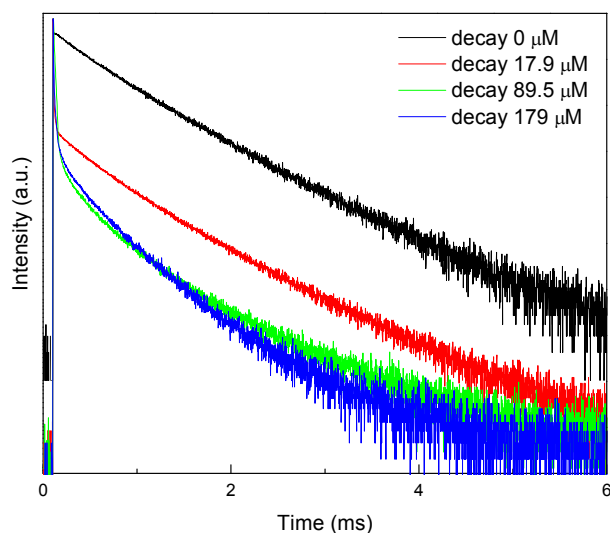

Figure S15. Luminescence decay times of PMO@Tb\_bpy observed at different concentrations. A reduction in the lifetime suggests a dynamic quenching mechanism.

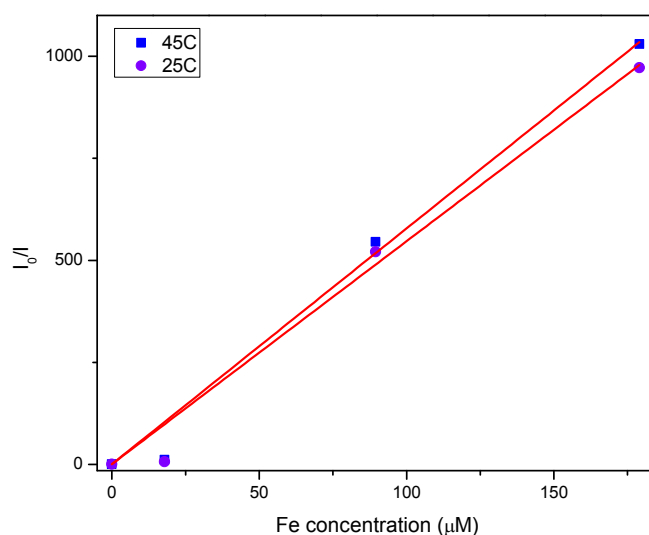

Figure S16. The Stern-Volmer curves of PMO@Tb\_bpy in the presence of Fe<sup>2+</sup> ions at different temperatures (25 °C and 45 °C).

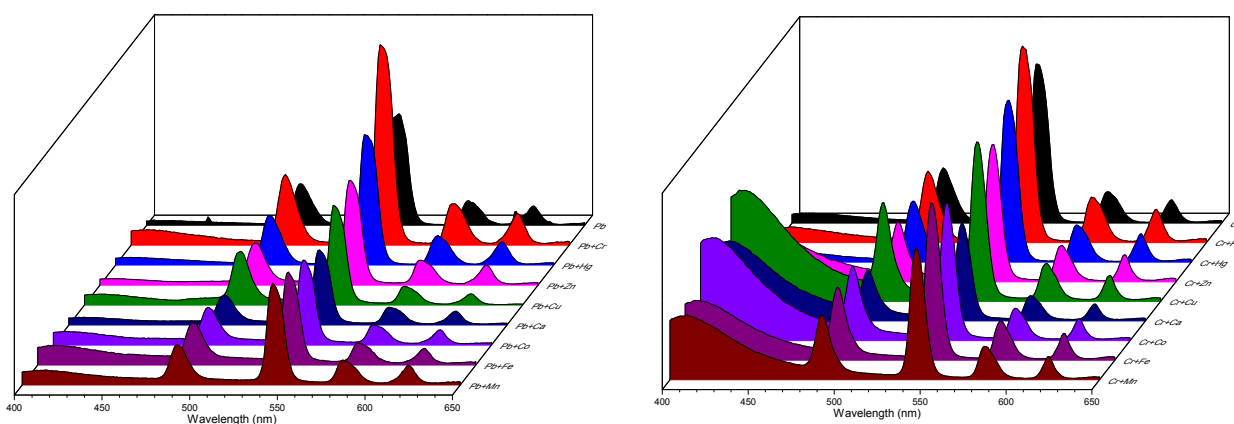

Figure S17. Emission spectra of PMO@Tb\_bpy in the presence of Pb<sup>2+</sup> and competing ions (left) and Cr<sup>3+</sup> and competing ions (right).

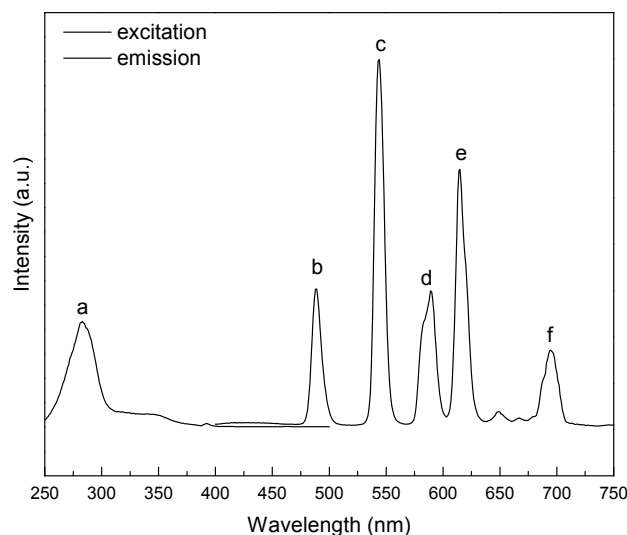

Figure S18 RT solid-state combined excitation-emission spectrum of PMO@Eu,Tb. The emission spectrum was recorded when exciting into the maximum of the broad ligand band and the excitation spectrum was monitored at the  $^5D_4 \rightarrow ^7F_5$  transition peak.

Table S9 Assignment of peaks labeled in Figure S18 (PMO@Eu,Tb in solid-state).

| Label      | Wavelength (nm) | Transitions                                                     |
|------------|-----------------|-----------------------------------------------------------------|
| Excitation |                 |                                                                 |
| a          | 282             | $\pi \rightarrow \pi^*$                                         |
| Emission   |                 |                                                                 |
| b          | 488             | $^5D_4 \rightarrow ^7F_6$ (Tb)                                  |
| c          | 543             | $^5D_4 \rightarrow ^7F_5$ (Tb)                                  |
| d          | 589             | $^5D_0 \rightarrow ^7F_1$ (Eu) / $^5D_4 \rightarrow ^7F_4$ (Tb) |
| e          | 616             | $^5D_0 \rightarrow ^7F_2$ (Eu)                                  |
| f          | 699             | $^5D_0 \rightarrow ^7F_4$ (Eu)                                  |

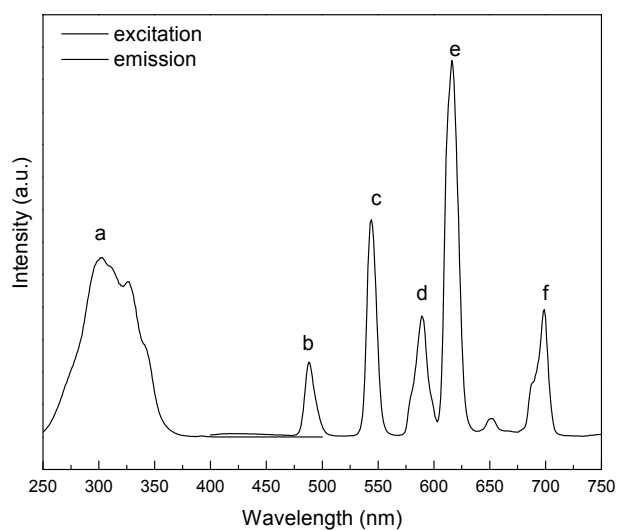

Figure S19 RT solid-state combined excitation-emission spectrum of PMO@Eu,Tb\_phen. The emission spectrum was recorded when exciting into the maximum of the broad ligand band and the excitation spectrum was monitored at the  $^5D_0 \rightarrow ^7F_2$  transition peak.

Table S10 Assignment of peaks labeled in Figure S19 (PMO@Eu,Tb\_phen in solid-state).

| Label      | Wavelength (nm) | Transitions                                                             |
|------------|-----------------|-------------------------------------------------------------------------|
| Excitation |                 |                                                                         |
| a          | 300             | $\pi \rightarrow \pi^*$                                                 |
| Emission   |                 |                                                                         |
| b          | 488             | ${}^5D_4 \rightarrow {}^7F_6$ (Tb)                                      |
| c          | 543             | ${}^5D_4 \rightarrow {}^7F_5$ (Tb)                                      |
| d          | 588             | ${}^5D_0 \rightarrow {}^7F_1$ (Eu) / ${}^5D_4 \rightarrow {}^7F_4$ (Tb) |
| e          | 616             | ${}^5D_0 \rightarrow {}^7F_2$ (Eu)                                      |
| f          | 698             | ${}^5D_0 \rightarrow {}^7F_4$ (Eu)                                      |

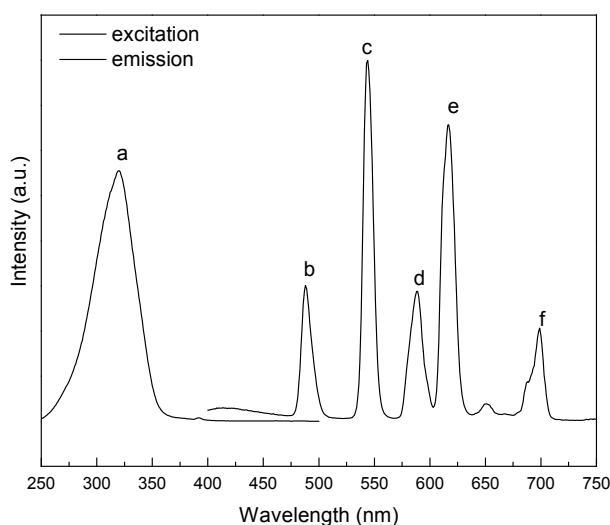

Figure S20 RT solid-state combined excitation-emission spectrum of PMO@Eu,Tb\_bpy. The emission spectrum was recorded when exciting into the maximum of the broad ligand band and the excitation spectrum was monitored at the  ${}^5D_4 \rightarrow {}^7F_5$  transition peak.

Table S11 Assignment of peaks labeled in Figure S20 (PMO@Eu,Tb\_bpy in solid-state).

| Label      | Wavelength (nm) | Transitions                                                             |
|------------|-----------------|-------------------------------------------------------------------------|
| Excitation |                 |                                                                         |
| a          | 319             | $\pi \rightarrow \pi^*$                                                 |
| Emission   |                 |                                                                         |
| b          | 488             | ${}^5D_4 \rightarrow {}^7F_6$ (Tb)                                      |
| c          | 544             | ${}^5D_4 \rightarrow {}^7F_5$ (Tb)                                      |
| d          | 589             | ${}^5D_0 \rightarrow {}^7F_1$ (Eu) / ${}^5D_4 \rightarrow {}^7F_4$ (Tb) |
| e          | 617             | ${}^5D_0 \rightarrow {}^7F_2$ (Eu)                                      |
| f          | 700             | ${}^5D_0 \rightarrow {}^7F_4$ (Eu)                                      |

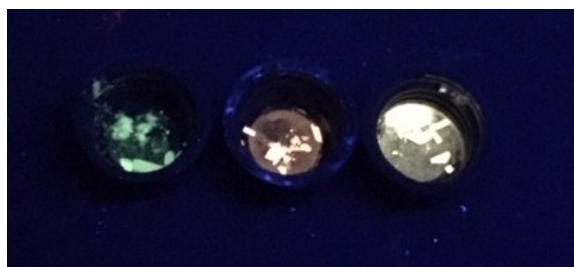

Figure S21 Photo taken under the UV lamp (302 nm excitation) of the PMO@Eu,Tb (left), PMO@Eu,Tb\_phen (center) and PMO@Eu,Tb\_bpy (left) samples.

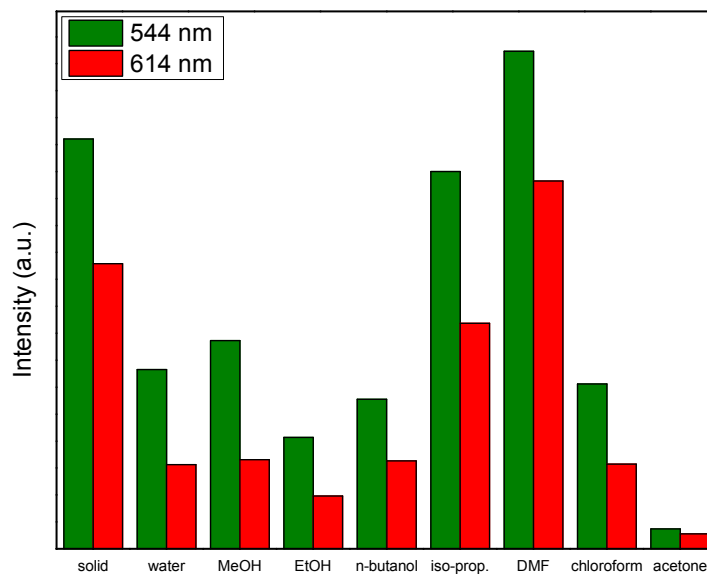

Figure S22 Bar graph representing the ratio of the 544 nm and 614 nm emission peaks in the PMO@Eu,Tb material dispersed in different solvents.

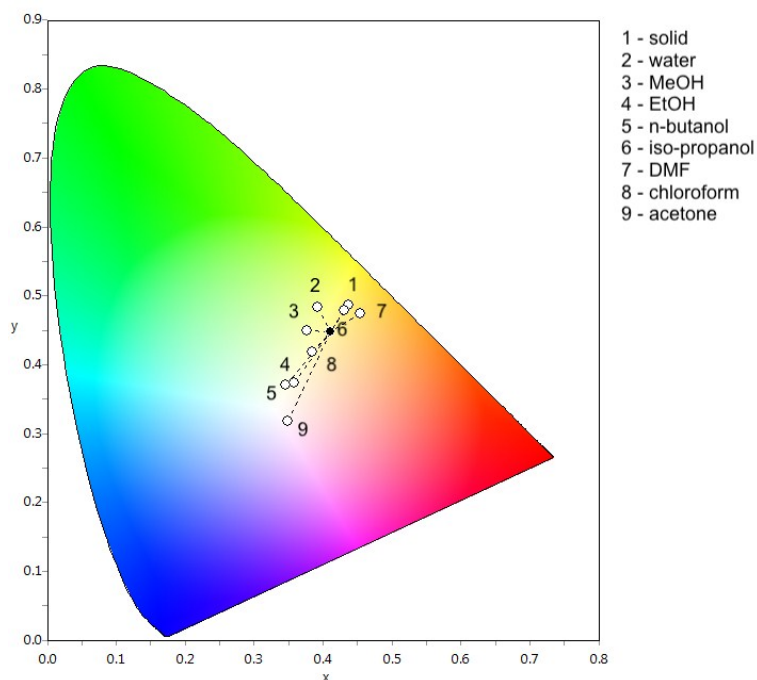

Figure S23 CIE color diagram showing the color change for PMO@Eu,Tb when dispersed in different solvents.

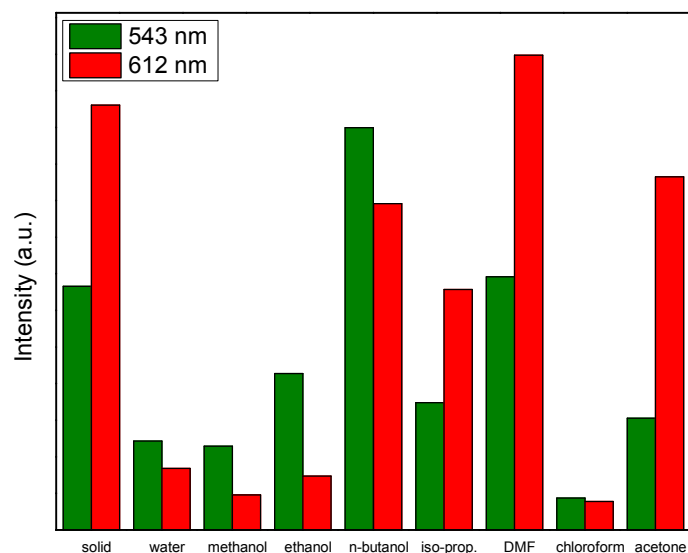

Figure S24 Bar graph representing the ratio of the 543 nm and 612 nm emission peaks in the PMO@Eu,Tb\_phen material dispersed in different solvents.

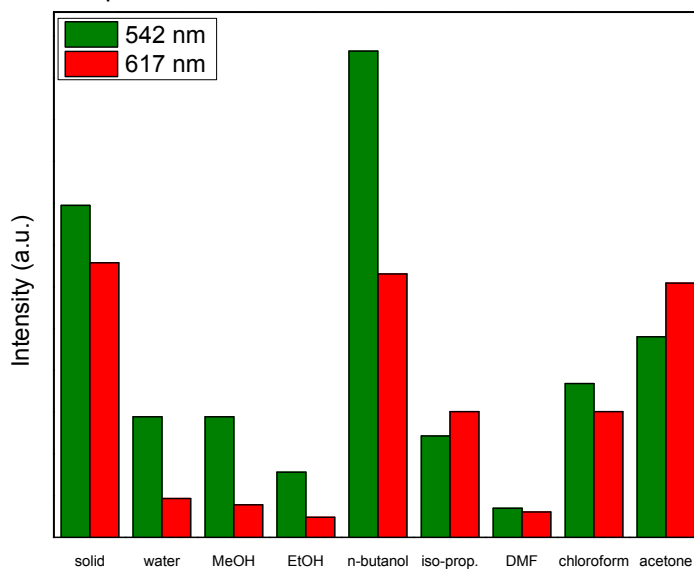

Figure S25 Bar graph representing the ratio of the 542 nm and 617 nm emission peaks in the PMO@Eu,Tb\_bpy material dispersed in different solvents.
